# Supplementary material for: Tetraphenylethene probe based fluorescent silica nanoparticles for the selective detection of nitroaromatic explosives
Source: Royal Society of Chemistry journal article supplement (doi:10.1039/d0ay01945c), 2021-01-01
Supplement: d0ay01945c1.pdf [file d0ay01945c1.pdf]

## Supporting Information

### **Tetraphenylethene probe based fluorescent silica nanoparticles for the selective detection of nitroaromatic explosives**

Muhammad Azhar Hayat Nawaz<sup>a,b,c</sup>, Lianjie Meng<sup>a</sup>, Huipeng Zhou<sup>a</sup>, Jia Ren<sup>a,b</sup>, Sohail Anjum Shahzad<sup>d</sup>, Akhtar Hayat<sup>c</sup>, Cong Yu<sup>a,b\*</sup>

<sup>a</sup>State Key Laboratory of Electroanalytical Chemistry, Changchun Institute of Applied Chemistry, Chinese Academy of Sciences, Changchun 130022, PR China

<sup>b</sup>University of Science and Technology of China, Hefei 230026, PR China

<sup>c</sup>Interdisciplinary Research Centre in Biomedical Materials (IRCBM), COMSATS University, Islamabad, Lahore Campus, Lahore, 54000, Pakistan

<sup>d</sup>Department of Chemistry, COMSATS University Islamabad, Abbottabad Campus, Abbottabad 22060, Pakistan

\* Corresponding author

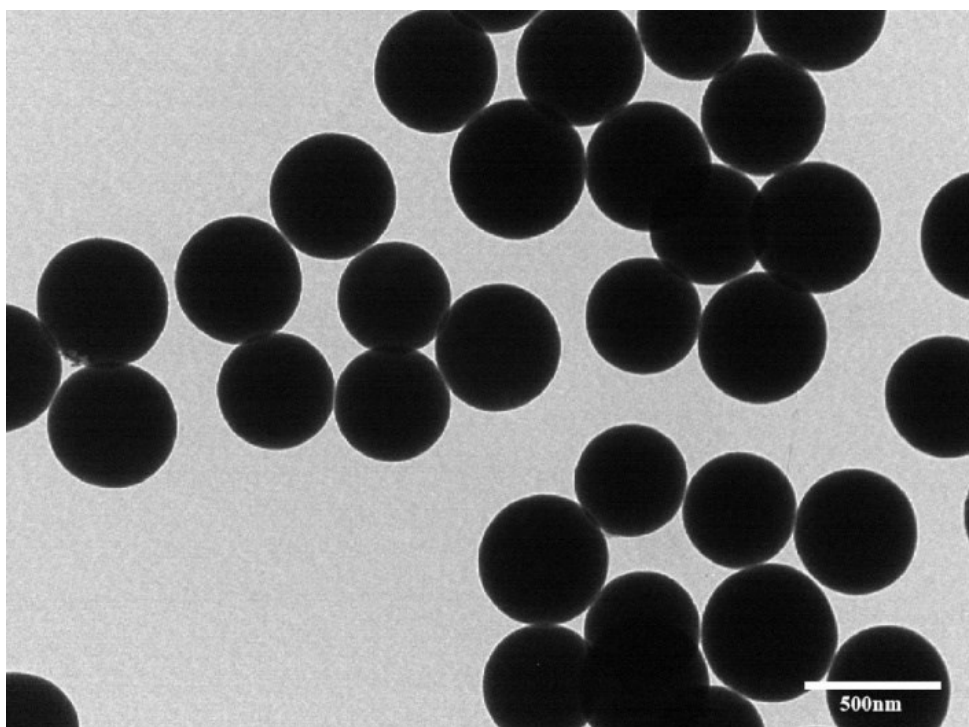

**Fig. S1.** TEM image of the prepared TPE-SiO<sub>2</sub> nanoparticles at 800 μM concentration of TPE-C2-2+ probe.

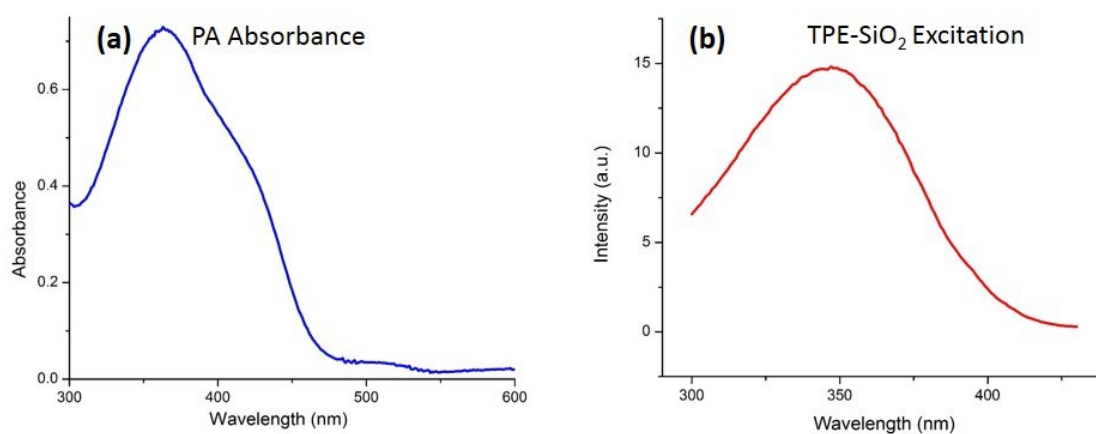

**Fig. S2.** (a) UV-vis light absorption spectrum of picric acid (PA). (b) Excitation spectrum of TPE-SiO<sub>2</sub> nanoparticles.

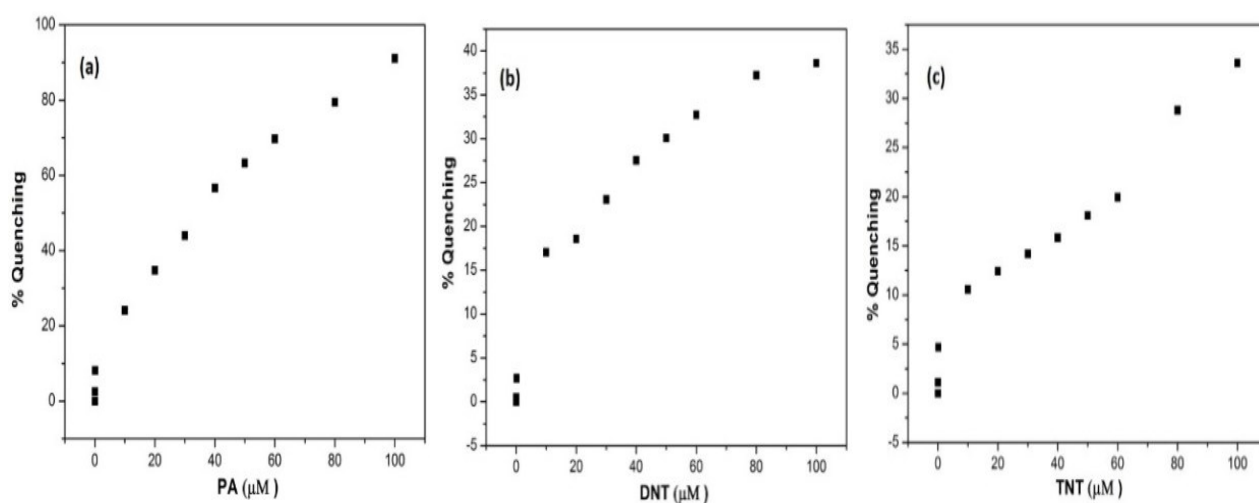

**Fig. S3.** Plots of % quenching of the TPE-SiO<sub>2</sub> fluorescent nanoparticles in the presence of different concentrations of the nitroaromatic explosives (a) PA, (b) DNT and (c) TNT.

**Table S1.** Comparison of the TPE-SiO<sub>2</sub> nanoparticles based fluorescence sensor and other reported fluorescent sensors for PA.

| Materials                        | Detection Limit | Linear range (μM) | Reference |
|----------------------------------|-----------------|-------------------|-----------|
| Fluorescent silica nanoparticles | 1.01 ppm        | –                 | 1         |
| Fluorescent AIE dots             | 32.1 nM         | –                 | 2         |
| All inorganic Perovskite QDs     | 0.8nM           | –                 | 3         |
| MoS <sub>2</sub> QDs             | 0.095 μM        | 0.099-36.5        | 4         |
| Pyrene-based probe               | 99 nM           | –                 | 5         |
| carbon dots                      | 1 μM            | –                 | 6         |
| graphene QDs                     | 0.3 μM          | 1-60              | 7         |
| COF                              | 0.289 μM        | 0-5               | 8         |
| COF                              | –               | 5-60              | 9         |

|                           |                |                |           |
|---------------------------|----------------|----------------|-----------|
| COF                       | -              | 0-64           | 10        |
| Gold nanoparticles        | 79 nM          | -              | 11        |
| Copper (I) metallogel     | 50 $\mu$ M     | -              | 12        |
| MOF                       | 9.5 $\mu$ M    | 9.3-467.7      | 13        |
| MOF                       | -              | 0-50           | 14        |
| MOFs                      | 0.0682 $\mu$ M | 0-60           | 15        |
|                           | 0.0694 $\mu$ M |                |           |
| covalent-organic polymers | 4.37 $\mu$ M   | -              | 16        |
| conjugated polymer        | -              | -              | 17        |
| conjugated polymers       | 0.5 $\mu$ M    | 0-220          | 18        |
|                           | 1 $\mu$ M      |                |           |
| conjugated polymer        | 0.11 $\mu$ M   | 0-20           | 19        |
| nonconjugated polymer     | 0.026 $\mu$ M  | 0.05-70        | 20        |
| small molecule            | 0.285 $\mu$ M  | 0-2.75         | 21        |
|                           |                | 0-1            |           |
| TPE-SiO <sub>2</sub>      | 0.01 $\mu$ M   | 0.1-50 $\mu$ M | This work |

## References

1. C. Miao, D. Li, Y. Zhang, J. Yu and R. Xu, *Microporous Mesoporous Materials*, 2014, **196**, 46-50.
2. C. Yan, W. Qin, Z. Li, Y. Zhou, Y. Cui and G. Liang, *Sensors Actuators B: Chemical*, 2020, **302**, 127201.
3. X. Chen, C. Sun, Y. Liu, L. Yu, K. Zhang, A. M. Asiri, H. M. Marwani, H.

- Tan, Y. Ai and X. Wang, *Chemical Engineering Journal*, 2020, **379**, 122360.
4. Y. Wang and Y. Ni, *Analytical chemistry*, 2014, **86**, 7463-7470.
  5. A. Kathiravan, A. Gowri, T. Khamrang, M. D. Kumar, N. Dhenadhayalan, K.-C. Lin, M. Velusamy and M. Jaccob, *Analytical chemistry*, 2019, **91**, 13244-13250.
  6. Q. Niu, K. Gao, Z. Lin and W. Wu, *Analytical Methods*, 2013, **5**, 6228-6233.
  7. L. Lin, M. Rong, S. Lu, X. Song, Y. Zhong, J. Yan, Y. Wang and X. Chen, *Nanoscale*, 2015, **7**, 1872-1878.
  8. P. Das and S. K. Mandal, *Journal of Materials Chemistry A*, 2018, **6**, 16246-16256.
  9. G. Das, B. P. Biswal, S. Kandambeth, V. Venkatesh, G. Kaur, M. Addicoat, T. Heine, S. Verma and R. Banerjee, *Chemical Science*, 2015, **6**, 3931-3939.
  10. G. Lin, H. Ding, D. Yuan, B. Wang and C. Wang, *Journal of the American Chemical Society*, 2016, **138**, 3302-3305.
  11. S. Kaja, D. P. Damera and A. Nag, *Analytica Chimica Acta*, 2020, **1129**, 12-23.
  12. S. Sarkar, S. Dutta, S. Chakrabarti, P. Bairi and T. Pal, *ACS applied materials and interfaces*, 2014, **6**, 6308-6316.
  13. F. Zhang, Y. Wang, T. Chu, Z. Wang, W. Li and Y. Yang, *Analyst*, 2016, **141**, 4502-4510.
  14. S. S. Nagarkar, A. V. Desai and S. K. Ghosh, *Chemical Communications*, 2014, **50**, 8915-8918.
  15. B. Wang, X.-L. Lv, D. Feng, L.-H. Xie, J. Zhang, M. Li, Y. Xie, J.-R. Li and

- H.-C. Zhou, *Journal of the American Chemical Society*, 2016, **138**, 6204-6216.
16. N. Sang, C. Zhan and D. Cao, *Journal of Materials Chemistry A*, 2015, **3**, 92-96.
17. J. Liu, Y. Zhong, J. W. Lam, P. Lu, Y. Hong, Y. Yu, Y. Yue, M. Faisal, H. H. Sung and I. D. J. M. Williams, *Macromolecules*, 2010, **43**, 4921-4936.
18. W. Yuan, W. Chi, R. Liu, H. Li, Y. Li and B. Z. Tang, *Macromolecular Rapid Communications*, 2017, **38**, 1600745.
19. A. S. Tanwar, S. Patidar, S. Ahirwar, S. Dehingia and P. K. Iyer, *Analyst*, 2019, **144**, 669-676.
20. S. G. Liu, D. Luo, N. Li, W. Zhang, J. L. Lei, N. B. Li and H. Q. Luo, *ACS applied materials and interfaces*, 2016, **8**, 21700-21709.
21. A. Ding, L. Yang, Y. Zhang, G. Zhang, L. Kong, X. Zhang, Y. Tian, X. Tao and J. Yang, *Chemistry—A European Journal*, 2014, **20**, 12215-12222.
